# Supplementary material for: Quality of Online Information on Multiple Myeloma Available for Laypersons
Source: MDPI journal article supplement (doi:10.3390/curroncol29070358), 2022-06-27
Supplement: s1 [file s1]

**Supplementary Table S3. Search results for websites and videos.**

| Health information source                   | A. Websites |           |           | B. Videos |
|---------------------------------------------|-------------|-----------|-----------|-----------|
| Search engine/platform                      | Google      | Bing      | Yahoo     | YouTube   |
| Initial search, n (%)                       | 100 (100)   | 100 (100) | 100 (100) | 50 (100)  |
| Duplicates within each search engine, n (%) | 21 (21.0)   | 46 (46.0) | 59 (59.0) | /         |
| Eligibility criteria not met, n             |             |           |           |           |
| No relevance to MM                          | 22          | 13        | 16        | 1         |
| Access required                             | 3           | 3         | 2         | 0         |
| Other language                              | 0           | 0         | 0         | 0         |
| Scientific article                          | 1           | 0         | 0         | 1         |
| Duplicate                                   | /           | /         | /         | 3         |
| $\Sigma$ (%)                                | 26 (26.0)   | 16 (16.0) | 18 (18.0) | 5 (10.0)  |
| Included websites for search engine, n (%)  | 53 (53.0)   | 38 (38.0) | 23 (23.0) | /         |
| Overlap, n                                  |             |           |           |           |
| Google/Bing                                 |             | 9         |           | /         |
| Bing/Yahoo                                  |             | 2         |           | /         |
| Yahoo/Google                                |             | 1         |           | /         |
| Google/Bing/Yahoo                           |             | 19        |           | /         |
| Overall unique, n (%)                       |             | 63 (100)  |           | 45 (90.0) |

MM, multiple myeloma.
