# Supplementary material for: Quality of Online Information on Multiple Myeloma Available for Laypersons
Source: MDPI journal article supplement (doi:10.3390/curroncol29070358), 2022-06-27
Supplement: s1 [file s1]

**Supplementary Table S4. Characterization of websites by search engine.**

| Search engine                               | Google     | Bing       | Yahoo      | P value            |
|---------------------------------------------|------------|------------|------------|--------------------|
| <b>Websites, n</b>                          | 53         | 38         | 23         |                    |
| <b>Website category, n (%)</b>              |            |            |            |                    |
| Scientific/governmental                     | 1 (1.9)    | 1 (2.6)    | 1 (4.3)    | 0.955 <sup>a</sup> |
| Foundation/advocacy                         | 26 (49.1)  | 21 (55.3)  | 11 (47.8)  |                    |
| News/media                                  | 10 (18.9)  | 5 (13.2)   | 4 (17.4)   |                    |
| Industry/for profit                         | 16 (30.2)  | 11 (28.9)  | 7 (30.4)   |                    |
| Personal commentary/blog                    | 0 (0.0)    | 0 (0.0)    | 0 (0.0)    |                    |
| <b>Paid/promoted, n (%)</b>                 | 9 (17.0)   | 4 (10.5)   | 2 (8.7)    | 0.520              |
| <b>Host continent, n (%)</b>                |            |            |            |                    |
| Europe                                      | 1 (1.9)    | 1 (2.6)    | 0 (0)      | /                  |
| North America                               | 52 (98.1)  | 37 (97.4)  | 23 (100)   |                    |
| South America                               | 0 (0.0)    | 0 (0.0)    | 0 (0.0)    |                    |
| Asia                                        | 0 (0.0)    | 0 (0.0)    | 0 (0.0)    |                    |
| Australia                                   | 0 (0.0)    | 0 (0.0)    | 0 (0.0)    |                    |
| Africa                                      | 0 (0.0)    | 0 (0.0)    | 0 (0.0)    |                    |
| Antarctica                                  | 0 (0.0)    | 0 (0.0)    | 0 (0.0)    |                    |
| <b>HON foundation certificate</b>           |            |            |            |                    |
| Valid certificate, n (%)                    | 8 (15.1)   | 9 (23.7)   | 6 (26.1)   | 0.579              |
| <b>JAMA score</b>                           |            |            |            |                    |
| Median (range)                              | 3 (1-4)    | 3 (1-4)    | 3 (1-4)    | 0.368              |
| <b>Flesch Reading Ease Score</b>            |            |            |            |                    |
| Mean (SD)                                   | 39 (9)     | 41 (10)    | 40 (11)    | 0.802              |
| <b>Flesch Kincaid Grade Level</b>           |            |            |            |                    |
| Mean (SD)                                   | 13 (2)     | 12 (2)     | 12 (2)     | 0.788              |
| <b>Sum DISCERN score</b>                    |            |            |            |                    |
| All websites, median (range)                | 42 (17-68) | 42 (22-68) | 41 (22-68) | 0.643              |
| Top 10 website hits, median (range)         | 46 (27-61) | 44 (27-61) | 42 (22-61) | 0.871              |
| <b>Sum key fact score</b>                   |            |            |            |                    |
| All websites, median (range)                | 26 (4-54)  | 25 (5-54)  | 24 (5-54)  | 0.957              |
| Top 10 website hits, median (range)         | 36 (5-53)  | 21 (5-53)  | 30 (11-53) | 0.918              |
| <b>Misleading/wrong facts</b>               |            |            |            |                    |
| Websites with misleading/wrong facts, n (%) | 10 (18.9)  | 8 (21.1)   | 5 (21.7)   | 0.935              |
| Overall identified wrong facts, n           | 13         | 11         | 6          |                    |

<sup>a</sup> Foundation/advocacy versus news/media reports versus industry/for profit. HON, Health on the Net; JAMA, Journal of the American Medical Association; SD, standard deviation.
