# Supplementary material for: Quality of Online Information on Multiple Myeloma Available for Laypersons
Source: MDPI journal article supplement (doi:10.3390/curroncol29070358), 2022-06-27
Supplement: s1 [file s1]

**Supplementary Table S5: DISCERN score for websites and videos.**

| Health information source                                                                                  | A. Websites |  | B. Videos |
|------------------------------------------------------------------------------------------------------------|-------------|--|-----------|
| Overall unique websites/videos, n (%)                                                                      | 63 (100)    |  | 45 (100)  |
| <b>Section 1: Is the publication reliable? (item 1-8), median (range)</b>                                  |             |  |           |
| Explicit aims                                                                                              | 3 (1-4)     |  | 3 (1-4)   |
| Aims achieved                                                                                              | 3 (1-4)     |  | 3 (2-4)   |
| Relevance to patients                                                                                      | 3 (1-5)     |  | 3 (1-4)   |
| Sources of information                                                                                     | 1 (1-5)     |  | 1 (1-5)   |
| Currency (date) of information                                                                             | 3 (1-5)     |  | 1 (1-5)   |
| Bias and balance                                                                                           | 3 (1-5)     |  | 1 (1-5)   |
| Additional sources of information                                                                          | 2 (1-5)     |  | 1 (1-3)   |
| Reference to areas of uncertainty                                                                          | 1 (1-4)     |  | 1 (1-3)   |
| Overall section 1                                                                                          | 19 (9-35)   |  | 14 (9-30) |
| <b>Section 2: How good is the quality of information on treatment choices? (item 9-15), median (range)</b> |             |  |           |
| How treatment works                                                                                        | 2 (1-5)     |  | 1 (1-4)   |
| Benefits of treatment                                                                                      | 3 (1-5)     |  | 3 (1-5)   |
| Risks of treatment                                                                                         | 1 (1-5)     |  | 1 (1-5)   |
| No treatment options                                                                                       | 2 (1-5)     |  | 1 (1-4)   |
| Quality of life                                                                                            | 2 (1-5)     |  | 1 (1-3)   |
| Other treatment options                                                                                    | 5 (1-5)     |  | 1 (1-5)   |
| Shared decision making                                                                                     | 2 (1-5)     |  | 1 (1-5)   |
| Overall section 2                                                                                          | 17 (7-34)   |  | 12 (7-23) |
| <b>Section 3: Overall rating of the publication (item 16), median (range)</b>                              |             |  |           |
| Overall quality                                                                                            | 3 (1-5)     |  | 2 (1-4)   |
