# Supplementary material for: Quality of Online Information on Multiple Myeloma Available for Laypersons
Source: MDPI journal article supplement (doi:10.3390/curroncol29070358), 2022-06-27
Supplement: s1 [file s1]

**Supplementary Table S2: Website and video content evaluation by MM key facts.**

| Category     | Item                                              | Description                                                                                                                                                                             |
|--------------|---------------------------------------------------|-----------------------------------------------------------------------------------------------------------------------------------------------------------------------------------------|
| Definition   | Clonal PCs $\geq 10\%$                            | Self-explanatory.                                                                                                                                                                       |
|              | Biopsy proven bony or extramedullary plasmacytoma | Biopsy proven local proliferation of clonal PCs.                                                                                                                                        |
|              | Hypercalcemia                                     | Calcium $> 2.75$ mmol/l ( $> 10.5$ mg/dl) or $> 0.25$ mmol/l above the upper reference value.                                                                                           |
|              | Renal insufficiency                               | Creatinine $\geq 2.0$ mg/dl ( $> 173$ $\mu$ mol/l) or GFR $< 40$ ml/min.                                                                                                                |
|              | Anemia                                            | Hemoglobin $< 10.0$ g/dl ( $< 6.21$ mmol/l) or $\geq 2.0$ g/l ( $> 1.24$ mmol/l) below the lower reference value.                                                                       |
|              | Bone lesions                                      | Detection of at least one bone lesion in imaging diagnostic.                                                                                                                            |
|              | Clonal BM PCs $\geq 60\%$                         | 60 % or more PCs in BM.                                                                                                                                                                 |
|              | Involved:uninvolved serum FLC ratio $\geq 100$    | FLC ratio in serum $\geq 100$ (involved/uninvolved FLC).                                                                                                                                |
|              | $> 1$ focal lesion on MRI studies                 | More than 1 focal lesion with size of more than 1 cm detected in MRI.                                                                                                                   |
|              | SLiM-CRAB                                         | SLiM-CRAB (acronym): <b>s</b> ixty percent BM PCs, <b>F</b> LC ratio, lesions on <b>M</b> RI, <b>h</b> ypercalcemia, <b>r</b> enal insufficiency, <b>a</b> nemia, <b>b</b> one lesions. |
| Symptoms     | Symptom-free                                      | MM diagnosis might be an accidental finding.                                                                                                                                            |
|              | Bone pain                                         | Bone pain caused by bone lesions.                                                                                                                                                       |
|              | Fractures                                         | Bone destruction may lead to pathological fractures.                                                                                                                                    |
|              | Fatigue                                           | Tiredness and exhaustion caused by anemia.                                                                                                                                              |
|              | Infection susceptibility                          | Immunosuppression and consequently higher risk of infections caused by antibody deficiency and low leucocytes.                                                                          |
|              | B symptoms                                        | B symptoms as fever, night sweat, loss of weight.                                                                                                                                       |
|              | Foaming urine                                     | As a sign of increased protein in the urine (Bence-Jones-Proteinuria, albuminuria).                                                                                                     |
|              | Further symptoms of anemia                        | E.g. disturbance of memory, dizziness, angina pectoris, abdominal angina.                                                                                                               |
|              | Bleeding tendency                                 | Caused by low platelet count.                                                                                                                                                           |
|              | Amyloidosis-associated symptoms                   | Accumulation of abnormal monoclonal protein in different organs, with subsequent organ dysfunction leading to renal and cardiac insufficiency, neuropathy etc.                          |
| Risk factors | MGUS                                              | The risk of progression from MGUS to MM is 1 %/year.                                                                                                                                    |
|              | Lymphoproliferative disease                       | Earlier diagnosis of MGUS might have been attributed to a lymphoproliferative disease.                                                                                                  |
|              | Age                                               | Incidence increases with age.                                                                                                                                                           |
|              | Etiology not known                                | The exact etiology is not known yet.                                                                                                                                                    |
|              | People of color                                   | Increased incidence in black people compared to Caucasian people.                                                                                                                       |
|              | First degree relative                             | Increased risk in case of first-degree relatives diagnosed with MGUS.                                                                                                                   |
|              | Genetic predisposition                            | There is a higher risk for people with a genetic predisposition.                                                                                                                        |
|              | Further internal factors                          | E.g. obesity, chronic infections.                                                                                                                                                       |
|              | External factors                                  | E.g. radiation, pesticides, products of rubber production.                                                                                                                              |
| Evaluation   | Medical history                                   | Mandatory to obtain any relevant information on patient's health status.                                                                                                                |
|              | Clinical examination                              | Mandatory to assess any signs or symptoms of a medical condition.                                                                                                                       |
|              | Differential blood count                          | Differentiation of white blood cells.                                                                                                                                                   |
|              | Electrolytes                                      | Sodium, potassium, calcium etc.                                                                                                                                                         |
|              | Kidney retention parameters                       | Creatinine, GFR, urea.                                                                                                                                                                  |

|                    |                                                 |                                                                                                                                                                                                            |
|--------------------|-------------------------------------------------|------------------------------------------------------------------------------------------------------------------------------------------------------------------------------------------------------------|
|                    | Total protein, albumin (S)                      | Quantity of total protein and albumin in serum.                                                                                                                                                            |
|                    | Protein electrophoresis (S)                     | Separates the serum protein components into five major fractions. Examines which globulin fraction is elevated.                                                                                            |
|                    | Immunofixation (S)                              | Assessment of the M protein type in serum.                                                                                                                                                                 |
|                    | Immunofixation (U)                              | Assessment of the M protein type in urine.                                                                                                                                                                 |
|                    | Igs (S)                                         | Concentration of IgG, IgA, IgM in serum.                                                                                                                                                                   |
|                    | FLCs (S)                                        | Concentration of FLCs (kappa and lambda) in serum.                                                                                                                                                         |
|                    | 24h-urine collection for protein quantification | Quantifies the urinary protein excretion per 24 h.                                                                                                                                                         |
|                    | LDH                                             | Non-specific marker of cell turnover.                                                                                                                                                                      |
|                    | Pro BNP                                         | Normal level helps to rule out chronic heart failure.                                                                                                                                                      |
|                    | GPT                                             | Evaluation of liver function.                                                                                                                                                                              |
|                    | Beta2-microglobuline (S)                        | (Prognostic) marker in PC disorders, particularly MM.                                                                                                                                                      |
|                    | Low dose whole body CT without contrast agents  | Detection of osteolyses and osteopenia, without contrast agents.                                                                                                                                           |
|                    | Projection radiography NO standard of care      | Projection radiography is no longer standard of diagnostics in PC disorders.                                                                                                                               |
|                    | MRI                                             | Evaluation of diffuse BM infiltration, focal bone lesions and extramedullary manifestations.                                                                                                               |
|                    | BM cytology                                     | Assessment of extent of PC infiltration and status of other hematopoietic cells.                                                                                                                           |
|                    | BM histology                                    | Assessment of extent of PC infiltration and status of other hematopoietic cells in the context of BM stroma.                                                                                               |
|                    | BM cytogenetics                                 | Detection of chromosomal aberrations.                                                                                                                                                                      |
| Prognostic factors | ISS                                             | ISS classifies into 3 prognostic subgroups on the basis of serum albumin, beta2-microglobuline, LDH and cytogenetics.                                                                                      |
|                    | Cytogenetics                                    | Cytogenetics (e.g. del(17p), t(4;14), t(14;16)) are important for prognostic significance.                                                                                                                 |
|                    | MRD                                             | Although patient obtain complete remission in MRI, PET, molecular diagnostic tests and flow cytometry, there is still MRD detectable. MRD-negativity correlates with longer and progression-free survival. |
| Management         | Osteoprotection                                 | Osteoprotection is indicated, if at least one osteolytic lesion detectable (e.g. bisphosphonates, Denosumab). It reduces bone-related events.                                                              |
|                    | Radiotherapy                                    | MM is radiation-sensitive, so radiation treats bone lesions and bone pain.                                                                                                                                 |
|                    | Surgery                                         | In order to stabilize the vertebral body with kyphoplasty.                                                                                                                                                 |
|                    | Corset                                          | In order to stabilize the vertebral body.                                                                                                                                                                  |
|                    | Transplant-eligible vs not transplant-eligible  | Patients without comorbidities till the age of 75 years are transplant eligible, so they tolerate HD-chemotherapy.                                                                                         |
|                    | Induction therapy                               | 4-6 bouts of VRD (Bortezomib, Lenalidomide, Dexamethasone) or VCD (Bortezomib, Cyclophosphamide, Dexamethasone) or VTD (Bortezomib, Thalidomide, Dexamethasone) or VD (Bortezomib, Dexamethasone).         |
|                    | HD Melphalan SCT                                | Mobilization of stem cells with G-CSF, collecting stem cells, HD Melphalan (200 mg/m <sup>2</sup> ), transplantation of stem cells.                                                                        |
|                    | Maintenance therapy                             | Maintenance therapy with Lenalidomide, Bortezomib or Thalidomide cause longer and progression-free survival.                                                                                               |
|                    | Treatment at relapse                            | It is mentioned that treatment at relapse is available.                                                                                                                                                    |
|                    | Continuous follow-up                            | Continuous follow-up for symptomatic patients: medical history, clinical examination, blood tests.                                                                                                         |
|                    | Best supportive (palliative) care possible      | It is mentioned that best supportive (palliative) care ist available.                                                                                                                                      |
|                    | Specialized care center                         | Best treatment available in specialized care centers for hematological diseases.                                                                                                                           |
|                    | Clinical trials                                 | For clinical advances and news in research.                                                                                                                                                                |
|                    | Rehabilitation                                  | Patients should get rehabilitation procedures with oncological focus.                                                                                                                                      |

|                 |                      |                                                                       |
|-----------------|----------------------|-----------------------------------------------------------------------|
| Supportive care | Psychosocial support | To help the patient handle their oncological situation.               |
|                 | Nutrition            | A well-balanced nutrition supports the patient to handle his disease. |
|                 | Sports               | Sports and activities support the patient to handle his disease.      |
| Outcome         | Not curative         | MM is not curative yet.                                               |
|                 | Overall survival     | Absolute: male 41 %, female 40 %; relative: male 48 %, female 45 %.   |

MM key facts were sourced from International Myeloma Working Group updated criteria for the diagnosis of multiple myeloma, Deutsche Gesellschaft für Hämatologie und Medizinische Onkologie e. V. (DGHO) on MM, and "Multiple myeloma: EHA-ESMO Clinical Practice Guidelines for diagnosis, treatment and follow-up".<sup>1-3</sup>

BM, bone marrow; BNP, brain natriuretic peptide; CT, computer tomography; FLC, free light chain; G-CSF, granulocyte colony-stimulating factor; GFR, glomerular filtration rate; GPT, glutamate pyruvate transaminase; HD, high dose; Ig, immunoglobulin; ISS, international staging system; LDH, lactate dehydrogenase; MGUS, monoclonal gammopathy of undetermined significance; MM, multiple myeloma; MRD, minimal residual disease; MRI, magnetic resonance imaging; PC, plasma cell; PET, positron emission tomography; S, serum; SCT, stem cell transplantation; U, urine.

1. Rajkumar SV, Dimopoulos MA, Palumbo A, Blade J, Merlini G, Mateos MV *et al.* International Myeloma Working Group updated criteria for the diagnosis of multiple myeloma. *Lancet Oncol* 2014; **15**(12): e538-548. e-pub ahead of print 2014/12/03; doi: 10.1016/S1470-2045(14)70442-5
2. Wörmann B, Driessen C, Einsele H, Goldschmidt H, Gonsilius E, Kortüm M *et al.* Multiples Myelom. In: DGHO, Onkopedia Leitlinien, 2018.
3. Dimopoulos MA, Moreau P, Terpos E, Mateos MV, Zweegman S, Cook G *et al.* Multiple Myeloma: EHA-ESMO Clinical Practice Guidelines for Diagnosis, Treatment and Follow-up. *Hemasphere* 2021; **5**(2): e528. doi: 10.1097/HS9.0000000000000528
