# Supplementary material for: Quality of Online Information on Multiple Myeloma Available for Laypersons
Source: MDPI journal article supplement (doi:10.3390/curroncol29070358), 2022-06-27
Supplement: s1 [file s1]

**Supplementary Table S6. Misleading and wrong facts on websites and videos.**

| Health information source                   | A. Websites          | B. Videos                                            |
|---------------------------------------------|----------------------|------------------------------------------------------|
| Overall unique websites/videos, n (%)       | 63 (100)             | 45 (100)                                             |
| Websites with misleading/wrong facts, n (%) | 10 (15.9)            | Videos with misleading/wrong facts, n (%)<br>1 (2.2) |
| By website category, n                      | By video category, n |                                                      |
| Scientific/governmental                     | 1                    | Academic institution<br>0                            |
| Foundation/advocacy                         | 2                    | Governmental organization<br>0                       |
| News/media                                  | 3                    | News/media<br>0                                      |
| Industry/for profit                         | 4                    | Industry/for profit<br>0                             |
| Personal commentary/blog                    | 0                    | Independent medical professional<br>1                |
|                                             |                      | Independent non-medical user<br>0                    |
| <b>Misleading/wrong facts</b>               |                      |                                                      |
| Overall, n                                  | 15                   | 1                                                    |
| By key fact category, n (%)                 |                      |                                                      |
| Definition                                  | 3 (20.0)             | 0 (0.0)                                              |
| Symptoms                                    | 0 (0.0)              | 0 (0.0)                                              |
| Risk factors                                | 1 (6.7)              | 0 (0.0)                                              |
| Evaluation                                  | 2 (13.3)             | 1 (2.2)                                              |
| Prognostic factors                          | 1 (6.7)              | 0 (0.0)                                              |
| Management                                  | 8 (53.3)             | 0 (0.0)                                              |
| Supportive care                             | 0 (0.0)              | 0 (0.0)                                              |
| Outcome                                     | 0 (0.0)              | 0 (0.0)                                              |
