# Supplementary material for: Quality of Online Information on Multiple Myeloma Available for Laypersons
Source: MDPI journal article supplement (doi:10.3390/curroncol29070358), 2022-06-27
Supplement: s1 [file s1]

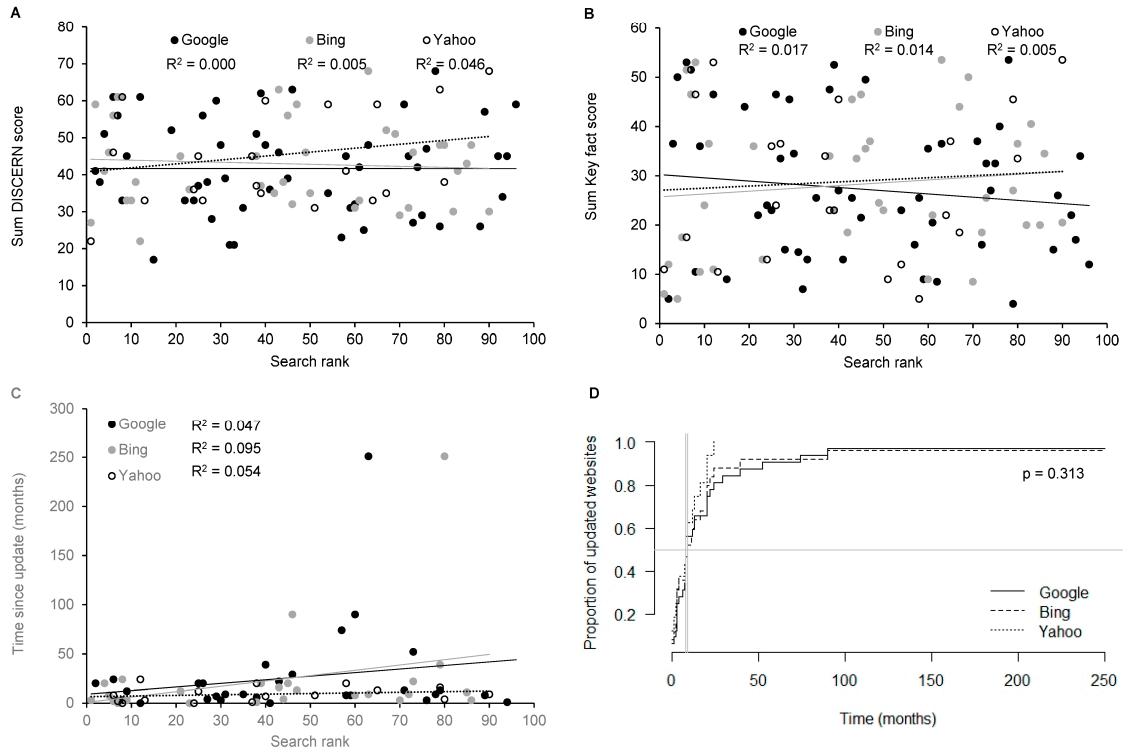

**Figure S1:** Characterization of websites by search rank and time since last update. The dot plots show the search rank (x axis) in dependency of the (A) sum of the DISCERN score, (B) sum of the key factor score or (C) time since last update (y axis). Each dot represents a website. The coefficient of determination  $R^2$  and the regression line are given for each search engine group. (D) Inverse Kaplan-Meier curves were chosen to demonstrate the proportion of website updates by time. An event represents a website update. The time to event was calculated as a difference in months between the update and access date. Only websites with an indicated update date were included (nGoogle = 32, nBing = 25, nYahoo = 16).
