# Supplementary material for: Quality of Online Information on Multiple Myeloma Available for Laypersons
Source: Curr Oncol. 2022 Jun 27;29(7):4522–40. doi: 10.3390/curroncol29070358 (PMC9324394; doi:10.3390/curroncol29070358)
Supplement: Supplementary file 1 [file curroncol-29-00358-s001.zip]

Archive with 9 entries (9 files):
- Supplementary _Table7.xlsx
- Supplementary _Table8.xlsx
- Supplementary_Figure_1.pdf
- Supplementary_Table1.pdf
- Supplementary_Table2.pdf
- Supplementary_Table3.pdf
- Supplementary_Table4.pdf
- Supplementary_Table5.pdf
- Supplementary_Table6.pdf
