# Supplementary material for: Quality of Online Information on Multiple Myeloma Available for Laypersons
Source: Curr Oncol. 2022 Jun 27;29(7):4522–40. doi: 10.3390/curroncol29070358 (PMC9324394; doi:10.3390/curroncol29070358)
Supplement: Supplementary file 1 [file curroncol-29-00358-s001.zip › Supplementary _Table7.xlsx]

## Sheet: Websites
Supplementary Table S7: Dataset on websites.
Rank level									2			1
Website name	Website link	Host country	Access date	Website category	Search engine	Search rank	HON foundation certificate	JAMA score	Sum DISCERN score	FRES (Flesch Reading Ease Score)	FKGL (Flesch Kincaid Grade Level)	Sum key fact score	Wrong/misleading facts	Wrong/misleading facts citation
Verywell Health	https://www.verywellhealth.com/multiple-myeloma-overview-4586928	USA	2020-03-12	News/media	Google	78	1	4	68	34	14.8	53.5	y	"For those who are planning to go on to ASCT, there are a variety of three-drug regimens that are currently recommended upfront, prior to the transplant, including: Bortzezomib - Doxorubicin - Dexamethasone."
American Cancer Society	https://www.cancer.org/cancer/multiple-myeloma/about/what-is-multiple-myeloma.html	USA	2020-02-28	Foundation/advocacy	Google	6	0	4	61	50	10.8	53	n	/
Canadian Cancer Society	https://www.cancer.ca/en/cancer-information/cancer-type/multiple-myeloma/multiple-myeloma/?region=on	Canada	2020-03-09	Foundation/advocacy	Google	39	1	2	62	41	12.4	52.5	n	/
Web MD	https://www.webmd.com/cancer/multiple-myeloma/default.htm	USA	2020-02-28	Foundation/advocacy	Google	7	0	4	56	54	9.5	51.5	n	/
Multiple Myeloma Research Foundation	https://themmrf.org/multiple-myeloma/	USA	2020-03-02	Foundation/advocacy	Google	11	0	1	51	36	13.2	50	y	"Characteristics of multiple myeloma include elevated levels of M protein and plasma cells in the serum and/or urine, a percentage of plasma cells in the bone marrow over 30%, anemia, renal failure, hypercalcemia, and osteolytic lesions."
Myeloma Canada	https://www.myelomacanada.ca/en/about-multiple-myeloma/what-is-myeloma	Canada	2020-03-10	Foundation/advocacy	Google	46	0	3	63	48	10.5	49.5	n	/
Merck Manual	https://www.merckmanuals.com/professional/hematology-and-oncology/plasma-cell-disorders/multiple-myeloma	USA	2020-03-09	Foundation/advocacy	Google	38	1	4	51	7	17.4	47.5	n	/
Wikipedia	https://en.wikipedia.org/wiki/Multiple_myeloma	USA	2020-03-02	Scientific/gouvernmental	Google	12	0	3	61	28	14.3	46.5	y	"The preferred treatment for those under the age of 65 is high-dose chemotherapy, commonly with bortezomib-based regimens, and lenalidomide–dexamethasone,[53] to be followed by a stem cell transplant."
cancer.net	https://www.cancer.net/cancer-types/multiple-myeloma/stages	USA	2020-03-04	Foundation/advocacy	Google	26	1	3	56	45	11.1	46.5	y	"SLiM: Kappa-to-lambda ratio greater than 100, based on serum testing, with absolute values greater than 100 mg/L or 10 mg/dL."
International Myeloma Foundation	https://www.myeloma.org/what-is-multiple-myeloma	USA	2020-03-04	Foundation/advocacy	Google	29	0	3	60	33	13.4	45.5	n	/
Everyday Health	https://www.everydayhealth.com/multiple-myeloma/guide/	USA	2020-03-16	News/media	Yahoo	79	1	4		43	12.2	45.5	n	/
Leukemia & Lymphoma Society	https://www.lls.org/myeloma-awareness?gclid=EAIaIQobChMIhcOtv6ji5wIViZyzCh3MXQBXEAAYAiAAEgIVJvD_BwE&gclsrc=aw.ds	USA	2020-03-03	Foundation/advocacy	Google	19	0	1	52	31	13.8	44	n	/
Pain Assist	https://www.epainassist.com/cancer/what-are-the-symptoms-of-end-stage-multiple-myeloma	USA	2020-03-16	Foundation/advocacy	Bing	83	1	3	22	39	12.1	40.5	n	/
Myeloma Research News	https://myelomaresearchnews.com/	USA	2020-03-12	News/media	Google	76	0	2	47	35	13.1	40	n	/
Cancer Support Community	https://www.cancersupportcommunity.org/multiple-myeloma	USA	2020-03-11	Foundation/advocacy	Google	71	0	3	59	59	8.5	37	n	/
American Family Physician	https://www.aafp.org/afp/1999/0401/p1885.html	USA	2020-03-11	News/media	Google	63	0	4	48	24	14.4	36.5	y	"Patients with MGUS require follow-up, since about 2 percent develop multiple myeloma or another malignant monoclonal gammopathy per year."; "Bone scintigraphy is used as a single test to screen for other bone lesions."; "Standard therapy for multiple myeloma includes alkylating agents administered with prednisone. The most commonly used alkylating agent is melphalan (Alkeran). Melphalan, 9 mg pe…
Memorial Sloan Kettering Cancer Center	https://www.mskcc.org/cancer-care/types/multiple-myeloma?gclid=EAIaIQobChMIgLGT5Kbi5wIVgZ6zCh20cwspEAAYAyAAEgK6QvD_BwE	USA	2020-02-25	Industry/for profit	Google	3	0	1	38	37	12.5	36.5	y	"Most people will have PET scans or MRI scans."; "In a stem cell transplant — also called a bone marrow transplant…."
Medicine Net	https://www.medicinenet.com/multiple_myeloma/article.htm	USA	2020-03-02	Foundation/advocacy	Google	9	1	4	45	28	14.3	36	n	/
Myeloma Crowd	https://www.myelomacrowd.org/what-is-multiple-myeloma/	USA	2020-03-10	Foundation/advocacy	Google	60	0	3	32	48	11.1	35.5	n	/
National Cancer Institute	https://www.cancer.gov/types/myeloma	USA	2020-03-05	Foundation/advocacy	Google	30	0	3	48	46	10.8	34.5	n	/
drugs.com	https://www.drugs.com/condition/multiple-myeloma.html	USA	2020-03-13	Industry/for profit	Google	94	1	3	45	47	10.2	34	y	"Multiple myeloma is diagnosed if the biopsy shows more than 30% plasma cells."
Lab Tests Online	https://labtestsonline.org/conditions/multiple-myeloma	USA	2020-03-04	Industry/for profit	Google	27	0	3	38	34	13.7	33.5	n	/
Blood Cancer Institute	https://bloodcancerinstitute.com/service/multiple-myeloma	USA	2020-03-11	Industry/for profit	Google	75	0	1	29	39	12.7	32.5	n	/
University of Iowa Care Center	https://uihc.org/health-topics/multiple-myeloma-stages-and-types	USA	2020-03-11	Industry/for profit	Google	73	0	2	27	41	12.3	32.5	n	/
National Center of Advancing Translational Science	https://rarediseases.info.nih.gov/diseases/7108/multiple-myeloma	USA	2020-03-09	Foundation/advocacy	Google	40	0	3	48	25	15.4	27	n	/
Dana Farber Cancer Institute	https://www.dana-farber.org/multiple-myeloma/	USA	2020-03-11	Industry/for profit	Google	74	0	1	42	29	14.9	27	n	/
The Social MedWork	https://thesocialmedwork.com/blog/multiple-myeloma-10-things-you-need-to-know	USA	2020-03-12	Foundation/advocacy	Google	89	0	3	57	41	12.6	26	n	/
National Health Center	https://www.nhs.uk/conditions/multiple-myeloma/	United Kingdom	2020-03-10	Foundation/advocacy	Google	43	0	2	46	42	12.4	25.5	n	/
Leukaemia Foundation	https://www.leukaemia.org.au/disease-information/myeloma/	USA	2020-03-10	Foundation/advocacy	Google	58	0	2	45	42	12.1	25.5	n	/
New Life Ticket	https://www.newlifeticket.com/conditions/10-signs-of-myeloma-you-need-to-be-aware-of/?gclid=EAIaIQobChMIqLO-4Kni5wIVCaGzCh3ntQmrEAAYAiAAEgIIXfD_BwE	USA	2020-03-09	News/media	Google	35	0	3	31	46	11.4	25.5	n	/
Seattle Cancer Care Alliance	https://www.seattlecca.org/diseases/multiple-myeloma	USA	2020-03-16	Industry/for profit	Bing	49	0	1	46	39	12.7	24.5	n	/
Healthline	https://www.healthline.com/health/multiple-myeloma	USA	2020-03-03	News/media	Google	24	1	2	33	44	11.3	24	y	"The International Staging System is based on the levels of blood plasma and beta-2 microglobulin."
Medical News Today	https://www.medicalnewstoday.com/articles/322105	USA	2020-03-04	News/media	Google	25	1	4	37	47	10.9	23	n	/
MD Anderson Cancer Center	https://www.mdanderson.org/cancer-types/multiple-myeloma.html	USA	2020-03-10	Foundation/advocacy	Google	54	0	1	35	33	13.6	23	n	/
Cancer Quest	https://www.cancerquest.org/patients/cancer-type/multiple-myeloma	USA	2020-03-12	Foundation/advocacy	Google	92	0	2	45	37	12.3	22	n	/
Cancer Treatment Centers of America	https://www.cancercenter.com/cancer-types/multiple-myeloma	USA	2020-03-03	Industry/for profit	Google	22	0	1	33	34	14.2	22	n	/
National Organization for Rare Disorders	https://rarediseases.org/rare-diseases/multiple-myeloma/	USA	2020-03-10	Foundation/advocacy	Google	45	0	3	39	25	14.2	21.5	n	/
Darzalex	https://www.darzalex.com/multiple-myeloma	USA	2020-03-16	Industry/for profit	Bing	90	0	1	63	52	10.4	20.5	n	/
Johns Hopkins Medicine	https://www.hopkinsmedicine.org/kimmel_cancer_center/types_cancer/multiple_myeloma.html	USA	2020-03-10	Industry/for profit	Google	61	0	1	42	42	12.4	20.5	y	"One treatment option offered early in the course of the disease is bone marrow transplantation -- a procedure in which diseased bone marrow is removed and, after high-dose chemotherapy, replaced with healthy marrow."
Wiki How	https://www.wikihow.com/Diagnose-Multiple-Myeloma	USA	2020-03-16	Foundation/advocacy	Bing	85	0	4	35	50	10.5	20	n	/
What Next	https://www.whatnext.com/conditions/cancer/multiple-myeloma	USA	2020-03-16	Foundation/advocacy	Bing	82	0	1	30	50	9.1	20	n	/
Spine Universe	https://www.spineuniverse.com/resource-center/spinal-cancer/symptoms-multiple-myeloma-spine	USA	2020-03-16	Foundation/advocacy	Bing	72	1	4	31	41	12.6	18.5	n	/
Radiopaedia	https://radiopaedia.org/articles/multiple-myeloma-1	USA	2020-03-16	Foundation/advocacy	Yahoo	67	0	2		11	18.1	18.5	n	/
Mayo Clinic	https://www.mayoclinic.org/diseases-conditions/multiple-myeloma/symptoms-causes/syc-20353378	USA	2020-02-28	Industry/for profit	Google	5	0	3	46	37	12.1	17.5	n	/
University of California San Francisco	https://www.ucsfhealth.org/conditions/multiple-myeloma	USA	2020-03-13	Industry/for profit	Google	93	0	1	34	41	12.8	17	y	"Another novel therapy, called Revimid, is currently in the last phase of clinical trials."; "The most common initial drug regimen is called VAD, which stands for the treatments vincristine, adriamycin and dexamethasone."
Stanford Health Care	https://stanfordhealthcare.org/medical-conditions/cancer/multiple-myeloma/about-this-condition/overview.html	USA	2020-03-11	Industry/for profit	Google	72	0	1	45	40	12.8	16	n	/
Bristol Myers Squibb	https://www.celgene.com/myeloma-deadly-to-chronic/	USA	2020-03-10	Industry/for profit	Google	57	0	2	23	44	11.9	16	n	/
American Society of Hematology	https://www.hematology.org/Patients/Cancers/Myeloma.aspx	USA	2020-03-04	Foundation/advocacy	Google	28	0	1	28	29	14.9	15	n	/
Rogel Cancer Center	https://www.rogelcancercenter.org/multiple-myeloma/what-multiple-myeloma	USA	2020-03-12	Industry/for profit	Google	88	0	1	26	53	9.5	15	n	/
Facty Health	https://facty.com/conditions/cancer/10-symptoms-of-multiple-myeloma/?style=quick&utm_source=adwords&adid=235592608747&utm_medium=c-search&utm_term=multiple%20myeloma&utm_campaign=**FH-Search-Multiple-Myeloma-Symptoms&gclid=EAIaIQobChMIhcOtv6ji5wIViZyzCh3MXQBXEAMYASAAEgL6I_D_BwE	USA	2020-03-05	News/media	Google	31	0	3	39	47	10.6	14.5	n	/
Medline Plus Genetics	https://ghr.nlm.nih.gov/condition/multiple-myeloma	USA	2020-03-10	Foundation/advocacy	Google	41	0	3	36	29	14.6	13	n	/
10 FAQ	https://10faq.com/health/symptoms-of-multiple-myeloma/?gclid=EAIaIQobChMIhcOtv6ji5wIViZyzCh3MXQBXEAMYAyAAEgJ7uPD_BwE	USA	2020-03-05	News/media	Google	33	0	2	21	32	12.9	13	n	/
Myeloma Explained	https://www.myelomaexplained.com/what-is-multiple-myeloma/	USA	2020-03-13	Foundation/advocacy	Google	96	0	2	59	41	11.9	12	n	/
Kyprolis	https://www.multiplemyelomaitson.com/what-is-multiple-myeloma/?utm_source=bing&utm_medium=cpc&utm_campaign=UNB_DTC_Awareness_Myeloma_EXM&utm_term=multiple%20myeloma&utm_content=MM_Core_EXM&gclid=CLDVjd7V6ecCFasGiAkdGigAvw&gclsrc=ds	USA	2020-03-13	Industry/for profit	Yahoo	1	0	1		55	9.1	11	n	/
Medline Plus	https://medlineplus.gov/multiplemyeloma.html	USA	2020-03-02	Foundation/advocacy	Google	8	0	2	33	47	11.3	10.5	n	/
Centers for Disease Control and Prevention	https://www.cdc.gov/cancer/myeloma/index.htm	USA	2020-03-10	Foundation/advocacy	Google	59	0	3	31	54	9.3	9	n	/
Health Prep	https://healthprep.com/cancer/symptoms-multiple-myeloma/?utm_source=google&utm_medium=search&utm_campaign=8670706552&utm_content=88109404706&utm_term=multiple%20myeloma&gclid=EAIaIQobChMIgLGT5Kbi5wIVgZ6zCh20cwspEAMYASAAEgJn2PD_BwE	USA	2020-03-02	Foundation/advocacy	Google	15	0	2	17	38	12.8	9	n	/
Revlimid	https://www.revlimid.com/multiple-myeloma	USA	2020-03-16	Industry/for profit	Bing	70	0	1	29	35	14.7	8.5	n	/
Winship Cancer Institute	https://winshipcancer.emory.edu/patient-care/cancer-types/multiple-myeloma.html	USA	2020-03-11	Industry/for profit	Google	62	0	1	25	32	14	8.5		/
Simply Health	https://simplyhealth.io/15-most-common-multiple-myeloma-symptoms/?utm_source=%2Bmyeloma&utm_medium=15MostCommonMultipleMyelomaSymptoms&utm_campaign=adw_us&gclid=EAIaIQobChMIhcOtv6ji5wIViZyzCh3MXQBXEAMYAiAAEgK0i_D_BwE	USA	2020-03-05	News/media	Google	32	0	1	21	44	11.3	7	n	/
Multiple Myeloma and You	https://www.multiplemyelomaandyou.com/bcma-in-multiple-myeloma.html?cc=ps_IYSIU8LEI1398401&mcm=40002&gclid=EAIaIQobChMIgLGT5Kbi5wIVgZ6zCh20cwspEAAYASAAEgJlhvD_BwE&gclsrc=aw.ds	USA	2020-02-24	Industry/for profit	Google	1	0	3	27	53	10.7	6	n	/
Xgeva	https://www.xgeva.com/how-cancer-weakens-bone/bone-lesions?gclid=EAIaIQobChMIgLGT5Kbi5wIVgZ6zCh20cwspEAAYAiAAEgKbcfD_BwE&gclsrc=aw.ds	USA	2020-02-25	Industry/for profit	Google	2	0	3	41	47	12.2	5	n	/
Cure Today	https://www.curetoday.com/articles/multiple-myeloma-know-the-basics	USA	2020-03-12	News/media	Google	79	0	3	26	46	12.2	4	n	/
