# Supplementary material for: Quality of Online Information on Multiple Myeloma Available for Laypersons
Source: Curr Oncol. 2022 Jun 27;29(7):4522–40. doi: 10.3390/curroncol29070358 (PMC9324394; doi:10.3390/curroncol29070358)
Supplement: Supplementary file 1 [file curroncol-29-00358-s001.zip › Supplementary _Table8.xlsx]

## Sheet: Videos
Supplementary Table S8: Dataset on videos.
Rank level									2	1
Video name	Channel	Video link	Host country	Access date	Video category	Search rank	HON code score	HON code evaluation	Sum DISCERN score	Sum key fact score	Wrong/misleading facts	Wrong/misleading facts citation
Multiple Myeloma Diagnosis and Treatment	Medicosis Perfectionalis	https://www.youtube.com/watch?v=eov_LKNsW4k	USA	2020-03-30	Industry/for profit	11	3	medium	38	34.5	n	/
How is multiple myeloma diagnosed and how do risk factors affect treatment? By Dr. Nikhil Munshi	Dana-Farber Cancer Institute	https://www.youtube.com/watch?v=tvlEkt8JUKQ	USA	2020-04-01	Academic insitution	28	4	medium	44	32.5	n	/
Multiple Myeloma Symposium: Diagnosis and Risk Assessment | Dana-Farber Cancer Institute	Dana-Farber Cancer Institute	https://www.youtube.com/watch?v=MVrPY10GD1g	USA	2020-04-01	Academic insitution	35	5	medium	42	28.5	n	/
What is multiple myeloma and how to manage symptoms of multiple myeloma? Kathleen Colson, RN	Dana-Farber Cancer Institute	https://www.youtube.com/watch?v=A7fj6s2Zj2I	USA	2020-04-02	Academic insitution	42	5	medium	53	26.5	n	/
Criteria for Multiple Myeloma	AACC	https://www.youtube.com/watch?v=jKzsn4_8zbE	USA	2020-04-02	Indipendent medical professional	37	6	high	43	25	n	/
Common symptoms and presenations of Mutiple Myeloma to primary care physicians	LabRoots	https://www.youtube.com/watch?v=0PH0uURdOK0	USA	2020-03-30	Indipendent medical professional	7	6	high	42	25	n	/
Multiple Myeloma: A Pathway to Better Outcomes	ImedexCME	https://www.youtube.com/watch?v=jdysFhwZc64	USA	2020-04-02	Academic insitution	46	6	high	78	20	n	/
2019 Multiple Myeloma Symposium | Current & Future Treatment	Dana-Farber Cancer Institute	https://www.youtube.com/watch?v=PRjxSoKOjZ4	USA	2020-03-30	Academic insitution	14	5	medium	74	20	n	/
Mutiple myeloma - blood cancer formed in bone marrow	MD Anderson Cancer Center	https://www.youtube.com/watch?v=AnzNuTjj5wg	USA	2020-03-30	Indipendent medical professional	8	3	medium	64	19.5	n	/
Medicine - Multiple Myeloma	Armando Hasudungan	https://www.youtube.com/watch?v=ghvoKhpAc64	Australia	2020-03-30	Indipendent medical professional	1	3	medium	29	19.5	y	"No known genetic component or environmental risk factor."
Multiple Myeloma I A Malignancy of Plasma Cells!	Medicosis Perfectionalis	https://www.youtube.com/watch?v=SVlV68XVQLg	USA	2020-03-30	Industry/for profit	6	3	medium	29	19.5	n	/
What is multiple myeloma? I Hematologic System Diseases I NCLEX-RN I Khan Academy	khanacademymedicine	https://www.youtube.com/watch?v=jdytgW5wKa4	USA	2020-03-30	Industry/for profit	5	4	medium	36	16	n	/
What is Multiple Myeloma?	Myeloma Crowd TV	https://www.youtube.com/watch?v=CbG81P1dDNg	USA	2020-03-30	Industry/for profit	12	4	medium	41	15	n	/
2020 Treatment Algorithm for Multiple Myeloma and Conclusions (part 5 of 5 - IMF ASH 2019 Satellite)	International Myeloma Foundation	https://www.youtube.com/watch?v=ozidXhRIgB4	USA	2020-03-31	Academic insitution	23	4	medium	57	14	n	/
Multiple Myeloma Mnemonic...the story of the plasma cell	Medicosis Perfectionalis	https://www.youtube.com/watch?v=yi84Tm6gGEc	USA	2020-03-30	Industry/for profit	15	3	medium	28	13.5	n	/
Multiple Myeloma - An Introduction	Cancer.Net	https://www.youtube.com/watch?v=PXxeWYKo2IQ	USA	2020-03-30	Indipendent medical professional	2	4	medium	58	13	n	/
How to fight against multiple myeloma: A Multiple Myeloma survivor story	Dana-Farber Cancer Institute	https://www.youtube.com/watch?v=V9IRZpX8J8g	USA	2020-03-31	Indipendent non-medical user	20	2	medium	54	12	n	/
Managing Multiple Myeloma through Novel Immunotherapy Approaches: A Case Study	UCSFMedicalCenter	https://www.youtube.com/watch?v=gI4OY3ADXnw	USA	2020-03-31	Indipendent medical professional	27	4	medium	51	11.5	n	/
Multiple Myeloma: Diagnosis and Treatment	Mayo Proceedings	https://www.youtube.com/watch?v=2ffSs_idYRY	USA	2020-03-31	Indipendent medical professional	18	3	medium	50	11.5	n	/
What to expect from Multiple Myeloma Relapse?	Sanofi Genzyme	https://www.youtube.com/watch?v=iAeJ4O7WdWo	USA	2020-04-02	Indipendent medical professional	47	5	medium	53	9	n	/
Myeloma Diagnosis and Treatment	Leukemia & Lymphoma Society	https://www.youtube.com/watch?v=M5PQHoNA7V0	USA	2020-04-01	Indipendent medical professional	31	3	medium	47	8.5	n	/
Multiple Myeloma - Closer to a Cure Community Lecture Series | Sarah Larson, MD, UCLA	UCLA Health	https://www.youtube.com/watch?v=X7SDOAKist0	USA	2020-04-01	Academic insitution	32	6	high	61	8	n	/
Multiple Myeloma: What you need to know - Mayo Clinic	Mayo Clinic	https://www.youtube.com/watch?v=aoe5E0AUGnM	USA	2020-04-01	Indipendent medical professional	30	3	medium	51	8	n	/
What are new treatment options for newly-diagnosed multiple myeloma patients? Dr. Paul G. Richardson	Dana-Farber Cancer Institute	https://www.youtube.com/watch?v=jNcF_7jlc_U	USA	2020-04-01	Academic insitution	34	4	medium	68	7	n	/
Multiple Myeloma - Mayo Clinic	Mayo Clinic	https://www.youtube.com/watch?v=uxdgFn1ZMRk	USA	2020-03-30	Indipendent medical professional	3	4	medium	49	7	n	/
Stem Cell Transplants for Multiple Myeloma Patients	Sanofi Genzyme	https://www.youtube.com/watch?v=NNMlXN0TOt0	USA	2020-03-30	Industry/for profit	17	6	high	48	5.5	n	/
A 17-year Fight Against Multiple Myeloma	American Association for Cancer Research	https://www.youtube.com/watch?v=JoB4iwOjNck	USA	2020-03-30	Industry/for profit	13	3	medium	45	5	n	/
Treatment for Multiple Myeloma	AJMCtv	https://www.youtube.com/watch?v=OUh0mcBe8uU	USA	2020-03-31	Indipendent medical professional	21	2	low	43	5	n	/
Multiple Myeloma: Combination Therapy for Relapsed/Refractory Patients	ImedexCME	https://www.youtube.com/watch?v=SqFgDRdwwtU	USA	2020-04-01	Academic insitution	29	4	medium	63	4.5	n	/
Imaging for Multiple Myeloma	Roswell Park Comprehensive Cancer Center	https://www.youtube.com/watch?v=QKI3UXorYew	USA	2020-03-31	Indipendent medical professional	26	4	medium	31	4.5	n	/
Can blood testing replace bone marrow testing for multiple myeloma?	International Myeloma Foundation	https://www.youtube.com/watch?v=witBmfL_nXQ	USA	2020-03-31	Indipendent medical professional	22	3	medium	29	4	n	/
Plasma Cell Dyscrasias (an intro to Multiple Myeloma)	Medicosis Perfectionalis	https://www.youtube.com/watch?v=SpR0ZtWqtEc	USA	2020-03-30	Industry/for profit	10	2	low	28	4	n	/
New treatments for multiple myeloma - Mayo Clinic	Mayo Clinic	https://www.youtube.com/watch?v=8W5HhD4c-b0	USA	2020-03-31	Indipendent medical professional	24	3	medium	56	3.5	n	/
Living with multiple myeloma	Novartis	https://www.youtube.com/watch?v=InFvWF3qv1Q	USA	2020-03-31	Indipendent non-medical user	19	2	low	30	3	n	/
Multiple Myeloma Basics - Anaemia	Vernon Louw MedEd	https://www.youtube.com/watch?v=jJXSgaDkYSc	USA	2020-04-02	Indipendent medical professional	36	2	low	28	3	n	/
Surviving Mutiples Myeloma - Mayo Clinic	Mayo Clinic	https://www.youtube.com/watch?v=a51TfbBEsrg	USA	2020-03-30	Indipendent non-medical user	4	3	medium	37	2.5	n	/
Stem Cell Transplantation as a Treatment for Multiple Myeloma - Mayo Clinic	Mayo Clinic	https://www.youtube.com/watch?v=seYMsBMN2Z8	USA	2020-04-02	Indipendent medical professional	48	3	medium	43	2	n	/
CAR T-Cell Therapy For Multiple Myeloma - Michael's Story - Nebraska Medicine	Nebraska Medicine Nebraska Medical Center	https://www.youtube.com/watch?v=V0waseHdcL4	USA	2020-04-02	Indipendent medical professional	40	4	medium	38	2	n	/
Kevin's Story - Multiple Myeloma Cancer Survivor | IU Health	IU Health	https://www.youtube.com/watch?v=CVkRXo01Dao	USA	2020-03-31	Indipendent non-medical user	25	3	medium	34	2	n	/
Top Promising Multiple Myeloma Research Presented at ASH 2019	International Myeloma Foundation	https://www.youtube.com/watch?v=Oj793HTeFBE	USA	2020-04-01	Academic insitution	33	2	low	46	1	n	/
Omar Nadeem, MD on caring for multiple myeloma patients	Dana-Farber Cancer Institute	https://www.youtube.com/watch?v=CXyaALHxpRo	USA	2020-04-02	Indipendent medical professional	38	3	medium	35	1	n	/
What is the best diet for myeloma patients?	International Myeloma Foundation	https://www.youtube.com/watch?v=UJZTXe_ks50	USA	2020-03-30	Indipendent medical professional	16	3	medium	28	1	n	/
Cancer researcher explains multiple myeloma relapse	UHNToronto	https://www.youtube.com/watch?v=yy2HKCZYbBc	USA	2020-04-02	Indipendent medical professional	50	3	medium	28	1	n	/
The Multiple Myeloma Research Foundation	Multiple Myeloma Research Foundation - MMRF	https://www.youtube.com/watch?v=AOhH_3WWVHE	USA	2020-04-02	Industry/for profit	39	4	medium	26	1	n	/
Treatment Options for Multiple Myeloma - Mayo Clinic	Mayo Clinic	https://www.youtube.com/watch?v=cyIvut8y-os	USA	2020-03-30	Indipendent medical professional	9	3	medium	33	0.5	n	/
